# Supplementary material for: Antimony sulphoiodide (SbSI), a narrow band-gap non-oxide ternary semiconductor with efficient photocatalytic activity
Source: Royal Society of Chemistry journal article supplement (doi:10.1039/c6ra23750a), 2016-01-01
Supplement: c6ra23750a1.pdf [file c6ra23750a1.pdf]

## Supporting Information

### Antimony Sulphoiodide (SbSI), a Narrow Band-Gap Non-Oxide Ternary Semiconductor with Efficient Photocatalytic Activity

Tamilselvan Muthusamy, and Aninda J. Bhattacharyya\*

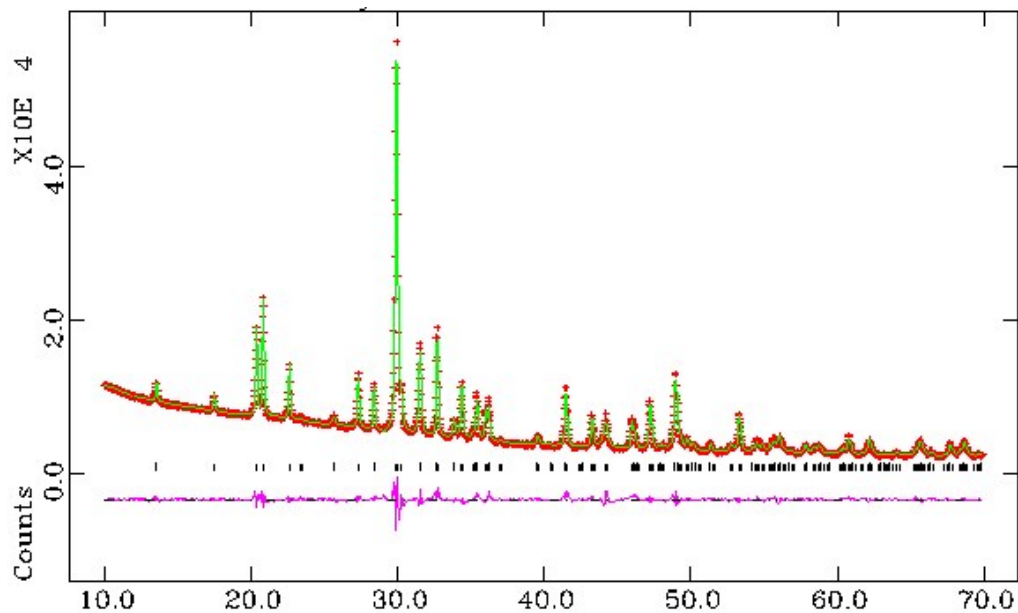

Figure S1. Rietveld refinement of SbSI.

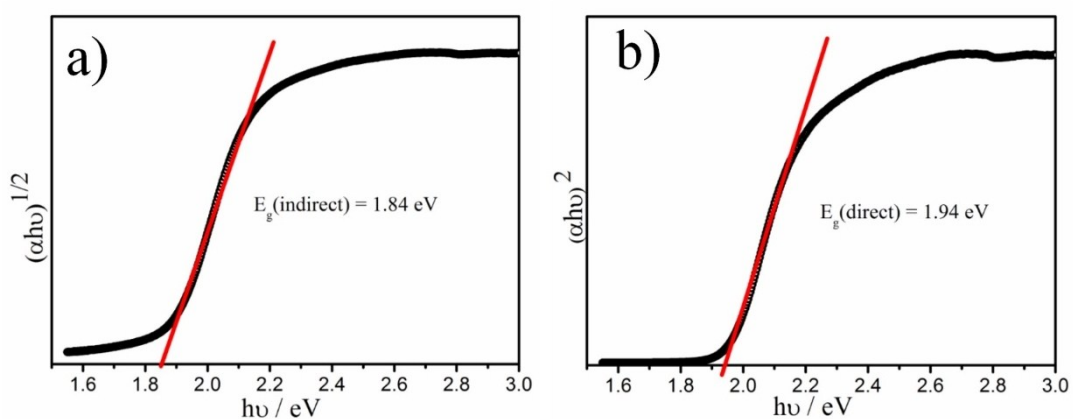

Figure S2. Shows the calculated indirect and direct band gap of SbSI respectively by using Tauc plot.

**Table S1.** Crystallographic parameters of SbSI from Rietveld refinement.

|                         |                  |
|-------------------------|------------------|
| Formula                 | SbSI             |
| Radiation               | Cu K $\alpha$    |
| 2 $\theta$ (degree)     | 10-70            |
| Symmetry                | Orthorhombic     |
| Space group             | <i>Pnam</i> (62) |
| a/ Å                    | 8.5262           |
| b/ Å                    | 10.1391          |
| c/ Å                    | 4.0989           |
| $\alpha$ /degree        | 90               |
| $\beta$ /degree         | 90               |
| $\gamma$ /degree        | 90               |
| Volume / Å <sup>3</sup> | 354.348          |
| Z                       | 4                |
| R <sub>p</sub>          | 2.4              |
| R <sub>wp</sub>         | 3.6              |
| $\chi^2$                | 7.58             |

**Table S2.** Interplane d-spacing value of orthorhombic SbSI.

| hkl value | d- spaing (Å) | Multiplicity | % of total facet area |
|-----------|---------------|--------------|-----------------------|
| (110)     | 6.52560420    | 4            | 65.06402817           |
| (020)     | 5.06955000    | 2            | 7.56251648            |
| (120)     | 4.35748401    | 4            |                       |
| (200)     | 4.26312000    | 2            |                       |
| (210)     | 3.92986994    | 4            |                       |
| (011)     | 3.80016430    | 4            | 22.16256756           |
| (111)     | 3.47101180    | 8            | 5.21088779            |
| (130)     | 3.14187058    | 4            |                       |
| (121)     | 2.98561532    | 8            |                       |
| (201)     | 2.95473302    | 4            |                       |
| (211)     | 2.83673198    | 8            |                       |

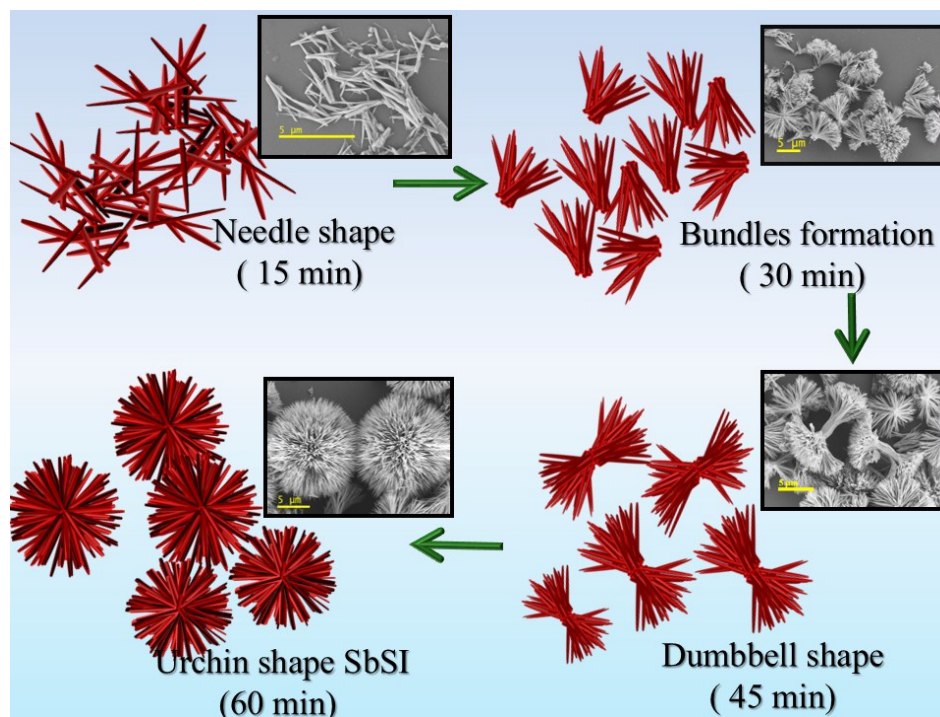

**Figure S3.** Schematic depiction and FESEM images of the stepwise transition from SbSI needles/rods to urchins: (aliquots collected from the reaction mixture at 110 °C at regular time intervals).

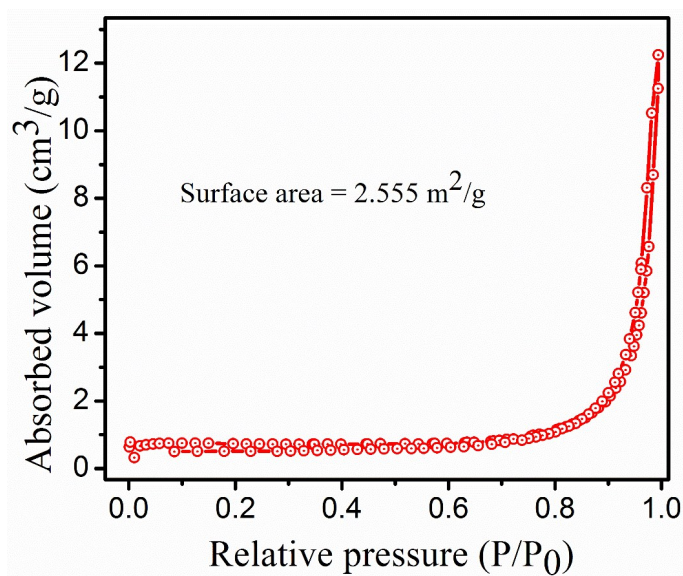

**Figure S4.** Nitrogen adsorption and desorption isotherms of SbSI

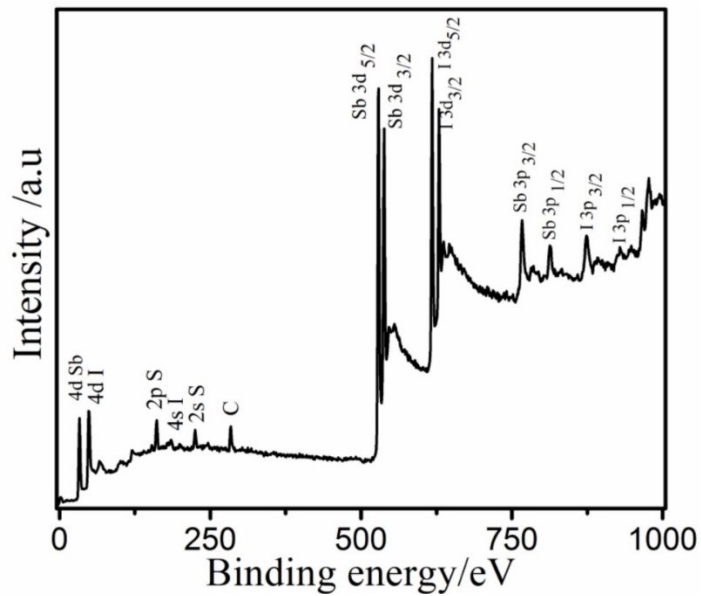

**Figure S5.** XPS spectrum of SbSI in the range of (0-1400) ev.

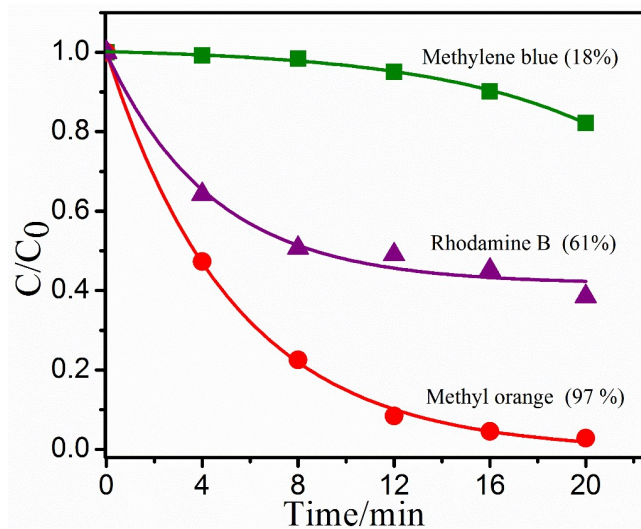

**Figure S6.** Fitted photodegradation profiles of Methylene blue, Rhodamine B and Methyl orange at 20 minutes under simulated solar irradiance.

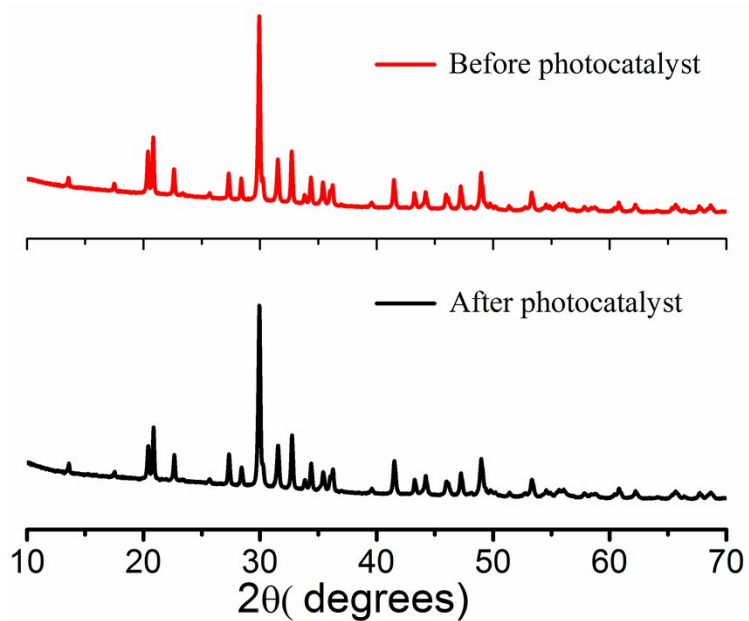

**Figure S7.** PXR D of SbSI before and after photocatalyst experiments.

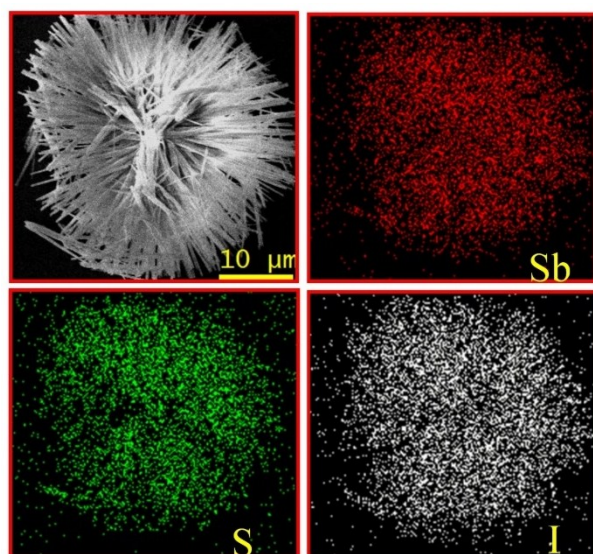

**Figure S8.** The recorded FESEM image of single urchin shape SbSI, and the corresponding elemental mapping of Sb (red), Sulphur (green), Iodine (White) at the end photocatalyst experiments
